# Supplementary material for: Evidence for a Lectin Specific for Sulfated Glycans in the Salivary Gland of the Malaria Vector, Anopheles gambiae
Source: PLoS One. 2014 Sep 10;9(9):e107295. doi: 10.1371/journal.pone.0107295 (PMC4160252; doi:10.1371/journal.pone.0107295)
Supplement: Table S1 — Results for in-gel tryptic digestion, and nano-LC MS/MS of PAGE presented in Figure 4B. (XLSX) [file pone.0107295.s001.xlsx]

## Sheet: Sheet1
Table 1S. Mass spectrometry results for fraction 9 presented in Figure 4.
Accession	Other Proteins	Coverage	# PSMs	# Peptides	# AAs	MW [kDa]	pI	Score	Area	Description
Slice 2
SCP_CHIOP	100	7	1	8	0.8	9.99	300.14	827900000	827900000	(P86909) Sarcoplasmic calcium-binding protein
Q95VB7_SCHMA	2.14	1	1	608	68.2	6.35	70.13	309800	309800	(Q95VB7) Albumin
D0VLV3_ECHGR	1.85	1	1	433	46.5	6.95	56.48	245700	245700	(D0VLV3) Enolase
Slice 3
Q95VB7_SCHMA	4.28	2	2	608	68.2	6.35	122.55	741400	741400	(Q95VB7) Albumin
A7XUF7_PENMO	7.59	1	1	158	18.1	8.09	66.19	339300	339300	(A7XUF7) Lysozyme
C0IXV4_LITST	7.59	1	1	158	18.2	8.28	66.19	339300	339300	(C0IXV4) C-type lysozyme
C1IIX1_FENME	7.59	1	1	158	18	8.92	66.19	339300	339300	(C1IIX1) Lysozyme C
Q8I7X3_PENSE	7.59	1	1	158	18.1	8.09	66.19	339300	339300	(Q8I7X3) Lysozyme
Q8IT75_PENMO	7.59	1	1	158	18.1	8.46	66.19	339300	339300	(Q8IT75) C-type lysozyme
Q95V66_LITVA	7.59	1	1	158	18.1	7.85	66.19	339300	339300	(Q95V66) Lysozyme
G9JKY9_9EUCA	7.84	1	1	153	18	8.6	66.19	339300	339300	(G9JKY9) Chicken-type lysozyme
Slice 4
D3TRU0_GLOMM	4.2	1	1	333	35.6	7.4	74.45	588200	588200	(D3TRU0) Glyceraldehyde-3-phosphate dehydrogenase
J9HYM2_AEDAE	4.22	1	1	332	35.4	8.18	74.45	588200	588200	(J9HYM2) AAEL016984-PA
H6BD30_OSTED	14.14	1	1	99	10.9	5.74	74.45	588200	588200	(H6BD30) GAPDH gliceraldehide 3 phosphate dehydrogenase
H2VR89_CAEJA	4.09	1	1	342	36.5	7.88	74.45	588200	588200	(H2VR89) Uncharacterized protein
Q95VB7_SCHMA	2.14	1	1	608	68.2	6.35	64.64	216300	216300	(Q95VB7) Albumin
Slice 5
Q7QIX6_ANOGA	10.12	3	2	168	18.6	7.34	199.7	1056000	1056000	(Q7QIX6) AGAP007120-PA
Slice 6
Q5TVM9_ANOGA	5.61	2	2	570	63.4	7.02	143.65	726200	726200	(Q5TVM9) AGAP011026-PA
Slice 7
G3CJR9_DIPMA	19.28	4	3	249	27.8	8.44	250.32	2227000	2227000	(G3CJR9) Antigen-5-like protein
Slice 8
B3VDI7_ANOGA	B3VDI9_ANOGA	35.32	11	5	252	26.9	4.25	670.85	63070000	(B3VDI7) Anti-platelet protein
Q5TVM9_ANOGA		17.19	11	6	570	63.4	7.02	612.68	2629000	(Q5TVM9) AGAP011026-PA
A0NBC2_ANOGA		30.24	7	5	248	28.2	4.93	578.52	5663000	(A0NBC2) AGAP007643-PA
Q7PX08_ANOGA		28.52	6	5	256	29.2	4.81	560.98	2806000	(Q7PX08) AGAP001151-PA
Q8WR41_ANOGA		29.12	6	3	182	18.8	4.08	368.91	3724000	(Q8WR41) 30 kDa protein
A6YPK1_TRIIF		15.98	3	3	244	28.1	9.06	278.23	3483000	(A6YPK1) Antigen-5-like protein
G3CJR9_DIPMA		19.28	4	3	249	27.8	8.44	247.94	2034000	(G3CJR9) Antigen-5-like protein
Q5TNW4_ANOGA		14.13	3	3	283	31.6	8.6	247.77	1779000	(Q5TNW4) AGAP010130-PA
Q95VB7_SCHMA		4.28	2	2	608	68.2	6.35	127.99	429400	(Q95VB7) Albumin
Slice 9
B3VDI7_ANOGA	B3VDI9_ANOGA	48.02	66	12	252	26.9	4.25	2445.45	665700000	(B3VDI7) Anti-platelet protein
Q5TVM9_ANOGA		44.91	32	19	570	63.4	7.02	1458.21	28380000	(Q5TVM9) AGAP011026-PA
Q7PX08_ANOGA		48.44	10	10	256	29.2	4.81	443.14	1372000	(Q7PX08) AGAP001151-PA
F5HK08_ANOGA	Q5TU96_ANOGA	27.69	10	7	390	43.2	6.61	345.07	1267000	(F5HK08) AGAP003398-PB
F5HIY0_ANOGA		23.17	7	6	315	35.1	5.63	232.35	1138000	(F5HIY0) AGAP013544-PA
Q7PNQ6_ANOGA		14.6	3	3	274	29.9	5.2	230.89	826600	(Q7PNQ6) AGAP006570-PA
A0NBC2_ANOGA		17.34	4	3	248	28.2	4.93	215.64	1116000	(A0NBC2) AGAP007643-PA
O97413_ANOGA	Q7PNX0_ANOGA	11.92	3	2	260	28.9	8.91	199.62	1145000	(O97413) Putative gVAG protein
Q95VB7_SCHMA		5.76	3	3	608	68.2	6.35	149.03	346600	(Q95VB7) Albumin
Q7PZ95_ANOGA		9.31	2	2	333	36.9	6.29	107.73	426400	(Q7PZ95) Transaldolase
Q5TNW4_ANOGA		7.77	2	2	283	31.6	8.6	106.14	497900	(Q5TNW4) AGAP010130-PA
Q7PNN6_ANOGA		10.91	2	2	330	34.3	8.88	92.59	274600	(Q7PNN6) AGAP005581-PA
E3X9D4_ANODA		2.12	2	2	945	105.9	5.48	79.33	326800	(E3X9D4) Ferrochelatase
Q7PS96_ANOGA	Q7QN98_ANOGA	6.23	2	2	321	35.7	4.7	79.33	326800	(Q7PS96) Annexin
Slice 10
Q5TVM9_ANOGA		49.12	50	23	570	63.4	7.02	1896.79	43300000	(Q5TVM9) AGAP011026-PA
B3VDI7_ANOGA	B3VDI9_ANOGA	49.6	36	12	252	26.9	4.25	1214.95	242200000	(B3VDI7) Anti-platelet protein
A7UR88_ANOGA	Q7PTH2_ANOGA	55.93	28	14	354	38.5	6.92	819.25	5314000	(A7UR88) AGAP007593-PA
Q8WR41_ANOGA		29.12	6	3	182	18.8	4.08	471.46	9232000	(Q8WR41) 30 kDa protein
Q5TV62_ANOGA		40.31	18	10	392	44.5	6.25	441.9	12560000	(Q5TV62) AGAP000607-PA
Q5TRW7_ANOGA		41.48	13	11	364	40.1	7.84	321.99	3568000	(Q5TRW7) Phosphoserine aminotransferase
Q7PZ95_ANOGA		37.54	10	8	333	36.9	6.29	318.12	2538000	(Q7PZ95) Transaldolase
Q7PWU4_ANOGA		21.69	5	5	332	35.5	7.93	243.52	944700	(Q7PWU4) AGAP008849-PA
Q7PZC1_ANOGA		19.01	5	5	363	39.5	9	199.33	736100	(Q7PZC1) AGAP011834-PA
O97413_ANOGA	Q7PNX0_ANOGA	20.38	4	3	260	28.9	8.91	196.04	3369000	(O97413) Putative gVAG protein
F5HK07_ANOGA	F5HK08_ANOGA;F5HK09_ANOGA;F5HK10_ANOGA;Q5TU96_ANOGA	10.13	4	3	395	43.7	6.65	193.63	652900	(F5HK07) AGAP003398-PD
F5HIY0_ANOGA		34.92	7	7	315	35.1	5.63	189.85	1900000	(F5HIY0) AGAP013544-PA
Q8WR22_ANOGA		21.48	6	5	391	43.7	6.46	181.23	663400	(Q8WR22) TRIO protein
RSSA_ANOGA		14.39	4	3	285	31.4	5.1	161	465600	(Q7PZ81) 40S ribosomal protein SA
Q95VB7_SCHMA		4.28	2	2	608	68.2	6.35	150.87	540600	(Q95VB7) Albumin
Q7PSB4_ANOGA		15.34	3	3	313	33.7	8.62	121.72	423600	(Q7PSB4) Malate dehydrogenase
E3X9D4_ANODA		2.12	3	2	945	105.9	5.48	92.38	349500	(E3X9D4) Ferrochelatase
Q7PS96_ANOGA	Q7QN98_ANOGA	6.23	3	2	321	35.7	4.7	92.38	349500	(Q7PS96) Annexin
Q7QDE7_ANOGA		11.3	2	2	301	33.6	4.51	92.11	434600	(Q7QDE7) AGAP003476-PA
Q7QHD3_ANOGA		7.34	2	2	368	40.2	7.03	89.74	120900	(Q7QHD3) AGAP011137-PA
Q9BIH4_ANOGA		13.1	2	2	145	16.3	8.32	66.12	603800	(Q9BIH4) GSG7 protein
Slice 11
Q5TVM9_ANOGA		26.14	14	10	570	63.4	7.02	838.3	10220000	(Q5TVM9) AGAP011026-PA
O97413_ANOGA		36.15	9	6	260	28.9	8.91	832.38	18250000	(O97413) Putative gVAG protein
Q5TV62_ANOGA		25.77	6	5	392	44.5	6.25	565.85	20210000	(Q5TV62) AGAP000607-PA
B3VDI7_ANOGA	B3VDI9_ANOGA	29.37	8	4	252	26.9	4.25	474.77	24870000	(B3VDI7) Anti-platelet protein
Q8WR22_ANOGA		14.07	5	4	391	43.7	6.46	392.19	1647000	(Q8WR22) TRIO protein
Q7PV48_ANOGA		9.44	3	3	466	51.5	8.76	357.17	2082000	(Q7PV48) Citrate synthase
Q7QFL2_ANOGA		17.92	5	5	385	43.6	7.34	305.21	1840000	(Q7QFL2) AGAP000548-PA
F7IW82_ANOGA	Q2TLV8_ANOGA	11.6	3	3	431	49.2	8.6	254.19	2431000	(F7IW82) AGAP000610-PA
O97407_ANOGA	Q7QFQ0_ANOGA	5.99	2	2	401	46.2	8.38	183.13	1775000	(O97407) SG1 protein
Q95VB7_SCHMA		4.28	2	2	608	68.2	6.35	133.14	606400	(Q95VB7) Albumin
Slice 12
Q5TVM9_ANOGA		24.56	13	8	570	63.4	7.02	848.82	4236000	(Q5TVM9) AGAP011026-PA
Q5TWW9_ANOGA		14.14	7	4	488	54.3	5.77	646	5140000	(Q5TWW9) AGAP007393-PA
E3XEC7_ANODA	Q17FL3_AEDAE;Q17H12_AEDAE	17.69	6	6	503	53.7	5.12	428.37	1095000	(E3XEC7) ATP synthase subunit beta
O97413_ANOGA	Q7PNX0_ANOGA	20	4	3	260	28.9	8.91	302.24	2258000	(O97413) Putative gVAG protein
Q8WR36_ANOGA	Q7PQK3_ANOGA	9.85	4	3	406	46.3	4.56	266.14	810000	(Q8WR36) Calreticulin
B3VDI7_ANOGA	B3VDI9_ANOGA	14.68	2	2	252	26.9	4.25	164.79	2770000	(B3VDI7) Anti-platelet protein
Q7Q4R9_ANOGA		6.16	2	2	552	60.7	8.18	116.52	645800	(Q7Q4R9) AGAP000901-PA
Slice 13
Q5TVM9_ANOGA		63.51	364	35	570	63.4	7.02	18683	860600000	(Q5TVM9) AGAP011026-PA
Q5TWW9_ANOGA		18.03	9	7	488	54.3	5.77	450	2432000	(Q5TWW9) AGAP007393-PA
Q7PNV2_ANOGA		25.64	9	7	468	51.6	5.14	420.99	3797000	(Q7PNV2) AGAP006371-PA
Q7QA89_ANOGA		23.39	10	9	573	63.5	8.75	418.72	1676000	(Q7QA89) AGAP004366-PA
Q5TMX9_ANOGA		13.35	6	5	472	53.1	5.1	309.02	1934000	(Q5TMX9) AGAP012407-PA
Q95VB7_SCHMA		4.28	5	2	608	68.2	6.35	250.95	17440000	(Q95VB7) Albumin
Q5TW04_ANOGA		9.15	5	4	634	70.7	6.8	245.67	1364000	(Q5TW04) AGAP011347-PA
O97413_ANOGA	Q7PNX0_ANOGA	16.92	4	3	260	28.9	8.91	197.91	669300	(O97413) Putative gVAG protein
B3VDI7_ANOGA	B3VDI9_ANOGA	19.44	4	3	252	26.9	4.25	184.09	2890000	(B3VDI7) Anti-platelet protein
Q7Q4A1_ANOGA		16.58	2	2	193	21.3	5.91	150.41	321200	(Q7Q4A1) AGAP008305-PA
Q7PGI2_ANOGA		4.07	2	2	589	65.1	7.36	88.46	192800	(Q7PGI2) AGAP002503-PA
Slice 14
Q5TVM9_ANOGA		60.88	256	33	570	63.4	7.02	11700.3	258000000	(Q5TVM9) AGAP011026-PA
Q7PYT9_ANOGA		26.31	16	13	593	67.2	6	540.59	3495000	(Q7PYT9) AGAP002102-PA
Q7PQK5_ANOGA		16.84	10	9	659	72.7	5.3	503.88	883100	(Q7PQK5) AGAP004192-PA
Q7Q3F6_ANOGA		17.18	11	8	786	85.2	8.53	447.34	1100000	(Q7Q3F6) AGAP007852-PA
Q7PIM5_ANOGA		9.16	4	3	513	55.2	8.94	286.46	1085000	(Q7PIM5) AGAP005822-PA
E3WLP8_ANODA		8.1	7	6	889	96.7	5.91	282.67	732100	(E3WLP8) Putative uncharacterized protein
B3VDI7_ANOGA	B3VDI9_ANOGA	19.44	5	3	252	26.9	4.25	199.42	1440000	(B3VDI7) Anti-platelet protein
Q7PVV8_ANOGA		7.51	4	4	732	83.3	6.19	152.23	223500	(Q7PVV8) AGAP009172-PA
Slice 15
Q5TVM9_ANOGA		46.84	42	20	570	63.4	7.02	2433.11	64910000	(Q5TVM9) AGAP011026-PA
Q7Q3F6_ANOGA		14.38	11	8	786	85.2	8.53	544.01	1392000	(Q7Q3F6) AGAP007852-PA
O97413_ANOGA	Q7PNX0_ANOGA	15.38	4	2	260	28.9	8.91	336.99	2557000	(O97413) Putative gVAG protein
Q7PX08_ANOGA		28.13	6	5	256	29.2	4.81	335.79	663000	(Q7PX08) AGAP001151-PA
Q7PVV8_ANOGA		6.15	5	3	732	83.3	6.19	259.5	255500	(Q7PVV8) AGAP009172-PA
A0NBC2_ANOGA		16.94	3	3	248	28.2	4.93	216.07	697600	(A0NBC2) AGAP007643-PA
Q5TV62_ANOGA		12.24	3	3	392	44.5	6.25	146.23	423900	(Q5TV62) AGAP000607-PA
G3CJR9_DIPMA		10.84	3	2	249	27.8	8.44	140.48	498600	(G3CJR9) Antigen-5-like protein
B3VDI7_ANOGA	B3VDI9_ANOGA	14.68	2	2	252	26.9	4.25	123.66	7180000	(B3VDI7) Anti-platelet protein
Slice 16
Q5TVM9_ANOGA		62.98	265	34	570	63.4	7.02	10689.2	457600000	(Q5TVM9) AGAP011026-PA
O97413_ANOGA	Q7PNX0_ANOGA	36.15	7	5	260	28.9	8.91	421.46	9681000	(O97413) Putative gVAG protein
Q7PYT9_ANOGA		14.17	8	7	593	67.2	6	350.02	1589000	(Q7PYT9) AGAP002102-PA
Q7Q3F6_ANOGA		14.25	9	7	786	85.2	8.53	318.97	625700	(Q7Q3F6) AGAP007852-PA
B3VDI7_ANOGA	B3VDI9_ANOGA	19.44	5	3	252	26.9	4.25	291.62	4438000	(B3VDI7) Anti-platelet protein
Q7QA89_ANOGA		20.42	8	8	573	63.5	8.75	276.34	1024000	(Q7QA89) AGAP004366-PA
Q7PX08_ANOGA		28.91	7	5	256	29.2	4.81	248.3	390100	(Q7PX08) AGAP001151-PA
Q8WR36_ANOGA	Q7PQK3_ANOGA	7.64	2	2	406	46.3	4.56	213.77	1221000	(Q8WR36) Calreticulin
Q7Q4V0_ANOGA		6.67	5	4	944	107.4	6.15	205.02	296000	(Q7Q4V0) AGAP000862-PA
Q5TWW9_ANOGA		6.97	3	2	488	54.3	5.77	195.46	593000	(Q5TWW9) AGAP007393-PA
Q5TV62_ANOGA		20.92	6	5	392	44.5	6.25	187.84	1584000	(Q5TV62) AGAP000607-PA
Q95VB7_SCHMA		4.28	2	2	608	68.2	6.35	167.65	3527000	(Q95VB7) Albumin
Q5TW04_ANOGA		7.26	3	3	634	70.7	6.8	112.4	700800	(Q5TW04) AGAP011347-PA
A0NBC2_ANOGA		10.08	2	2	248	28.2	4.93	99.51	346600	(A0NBC2) AGAP007643-PA
B0WNP7_CULQU		10.08	2	2	248	28.2	4.88	99.51	346600	(B0WNP7) 14-3-3 protein
A7UR78_ANOGA		10.08	2	2	248	28.3	5.11	99.51	346600	(A7UR78) AGAP007643-PC
C4WXJ3_ACYPI		10.12	2	2	247	28.2	4.84	99.51	346600	(C4WXJ3) ACYPI003154 protein
E3T3S3_CULPI		10.08	2	2	248	28.3	5.03	99.51	346600	(E3T3S3) 14-3-3 zeta
C6ZQT6_AEDTR		10.08	2	2	248	28.2	4.88	99.51	346600	(C6ZQT6) Multifunctional chaperone
J9JS66_ACYPI		9.29	2	2	269	30.7	7.83	99.51	346600	(J9JS66) Uncharacterized protein
B8RJ19_CULTA		17.81	2	2	146	16.3	9.28	97.04	495800	(B8RJ19) Citrate synthase
Slice 17
Q5TVM9_ANOGA		50	105	28	570	63.4	7.02	4896.57	133800000	(Q5TVM9) AGAP011026-PA
Q7PYT9_ANOGA		17.03	9	7	593	67.2	6	383.06	2056000	(Q7PYT9) AGAP002102-PA
Q7Q3F6_ANOGA		7.89	5	4	786	85.2	8.53	376.96	454400	(Q7Q3F6) AGAP007852-PA
Q95VB7_SCHMA		4.28	2	2	608	68.2	6.35	148.84	1043000	(Q95VB7) Albumin
B3VDI7_ANOGA	B3VDI9_ANOGA	14.68	2	2	252	26.9	4.25	128.46	1119000	(B3VDI7) Anti-platelet protein
Q7PQ97_ANOGA		3.6	2	2	722	81.4	5.17	94.33	244000	(Q7PQ97) AGAP004394-PA
Slice 18
Q5TVM9_ANOGA	47.19	66	23	570	63.4	7.02	3280.9	99600000	99600000	(Q5TVM9) AGAP011026-PA
Q5XLG7_ANOGA	11.51	28	26	3398	388.9	7.72	1740.95	2761000	2761000	(Q5XLG7) SGS4
Q7Q3F6_ANOGA	4.71	2	2	786	85.2	8.53	150.45	356300	356300	(Q7Q3F6) AGAP007852-PA
Slice 19
Q5TVM9_ANOGA	17.72	12	6	570	63.4	7.02	830	5376000	5376000	(Q5TVM9) AGAP011026-PA
Slice 20
Q5TVM9_ANOGA	11.75	5	4	570	63.4	7.02	427.64	3631000	3631000	(Q5TVM9) AGAP011026-PA
